# Supplementary material for: Transcriptome analyses of early cucumber fruit growth identifies distinct gene modules associated with phases of development
Source: Springer Nature journal article supplement (doi:10.1186/1471-2164-13-518), 2012-10-02
Supplement: 12864_2012_4274_MOESM10_ESM.pdf [file 12864_2012_4274_MOESM10_ESM.pdf]

**A**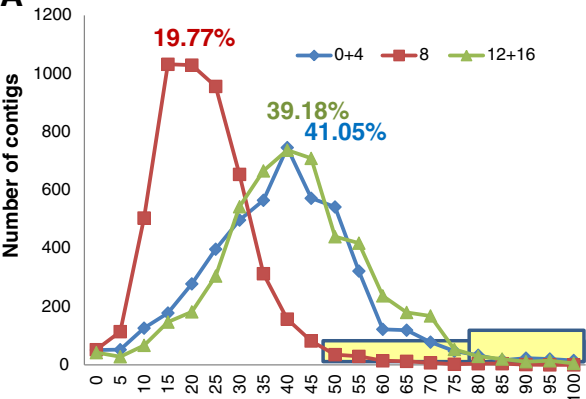

Distribution of percent of contig reads observed in specified age group

**B**

### Functional enrichment of top 2.5% group of contigs at different ages

| Gene Ontology category                 | 0-4  | 8    | 12+16 |
|----------------------------------------|------|------|-------|
| cell organization and biogenesis       | 3.7  | 2.26 | 0.38  |
| cell                                   | 4.45 | 1.62 | 0.92  |
| DNA or RNA metabolism                  | 3.54 | 0.96 | 0     |
| plastid                                | 2.39 | 1.78 | 0.45  |
| cell wall                              | 3.65 | 3.12 | 1.42  |
| lipid metabolism                       | 2.94 | 4.03 | 0.61  |
| extracellular                          | 2.69 | 3.67 | 3.36  |
| minor CHO metabolism                   | 3.94 | 2.7  | 8.19  |
| transcription factor                   | 0.98 | 1.34 | 2.48  |
| development                            | 0.92 | 1.27 | 3.21  |
| stress                                 | 1.2  | 0.54 | 5.6   |
| response to abiotic or biotic stimulus | 2.45 | 2.55 | 5.69  |
