# Supplementary material for: Transcriptome analyses of early cucumber fruit growth identifies distinct gene modules associated with phases of development
Source: Springer Nature journal article supplement (doi:10.1186/1471-2164-13-518), 2012-10-02

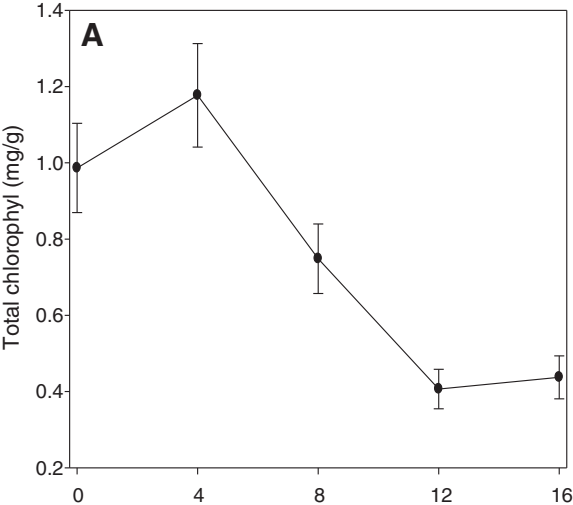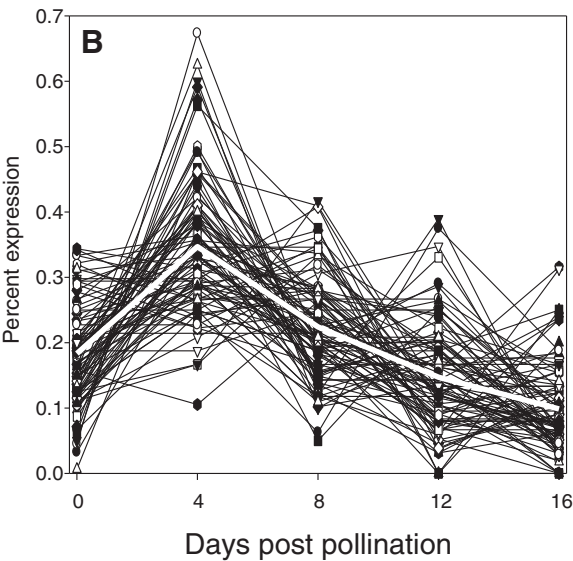

Supplement: 12864_2012_4274_MOESM12_ESM.pdf [file 12864_2012_4274_MOESM12_ESM.pdf]
