# Supplementary material for: Transcriptome analyses of early cucumber fruit growth identifies distinct gene modules associated with phases of development
Source: Springer Nature journal article supplement (doi:10.1186/1471-2164-13-518), 2012-10-02
Supplement: 12864_2012_4274_MOESM14_ESM.pdf [file 12864_2012_4274_MOESM14_ESM.pdf]

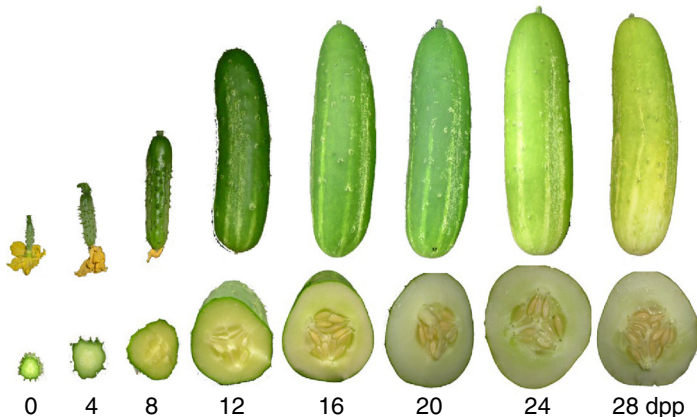

Cell division  
 Peak respiration  
 Rapid fruit elongation  
 Rapid increase diameter  
 Surface bloom  
 Increase cuticle thickness  
 Decrease in chlorophyll  
 Presence of warts  
 Trichomedensity  
 Gelatinous placenta forms  
 Hard/tan seed coat forms  
 Susceptibility to *P. capsici*

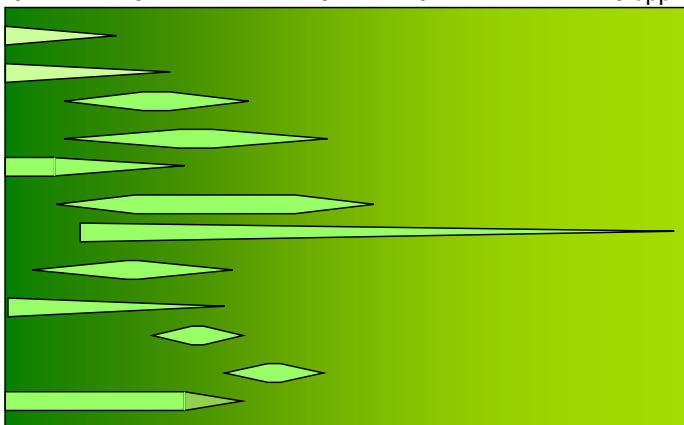

Cell cycle genes

Histones

Ribosomal genes

Photosynthesis/plastid

Cell structure

Lipase/lipid transfer/cuticle

Latex genes

Unknown or cucurbit specific genes

Phloem proteins

Stress proteins

Stress transcription factors

Development transcription factors
